# Supplementary material
Source: PubMed Central journal article supplement (PMC6921631)
Supplement: ao9b03142_si_001.pdf [file ao9b03142_si_001.pdf]

## SUPPLEMENTARY INFORMATION

### **Porous graphene-like carbon from fast catalytic decomposition of biomass for energy storage applications**

**Aurora Gomez-Martin<sup>1,2,\*</sup>, Julian Martinez-Fernandez<sup>1,2</sup>, Mirco Ruttert<sup>3</sup>, Martin Winter<sup>3,4</sup>, Tobias Placke<sup>3</sup>, Joaquin Ramirez-Rico<sup>1,2,\*</sup>**

<sup>1</sup> Dpto. Física de la Materia Condensada, Universidad de Sevilla, Avda. Reina Mercedes SN, 41012 Sevilla, Spain.

<sup>2</sup> Instituto de Ciencia de Materiales de Sevilla (CSIC-Univ. Sevilla), Avda. Américo Vespucio 49, 41092 Sevilla, Spain.

<sup>3</sup> University of Münster, MEET Battery Research Center, Institute of Physical Chemistry, Corrensstraße 46, 48149 Münster, Germany

<sup>4</sup> Helmholtz Institute Münster, IEK-12, Forschungszentrum Jülich GmbH, Corrensstraße 46, 48149 Münster, Germany

---

\* Corresponding author. Email: [agomez28@us.es](mailto:agomez28@us.es), Tel: +34 9545 56423

\* Corresponding author. Email: [jrr@us.es](mailto:jrr@us.es), Tel: +34 9545 50963

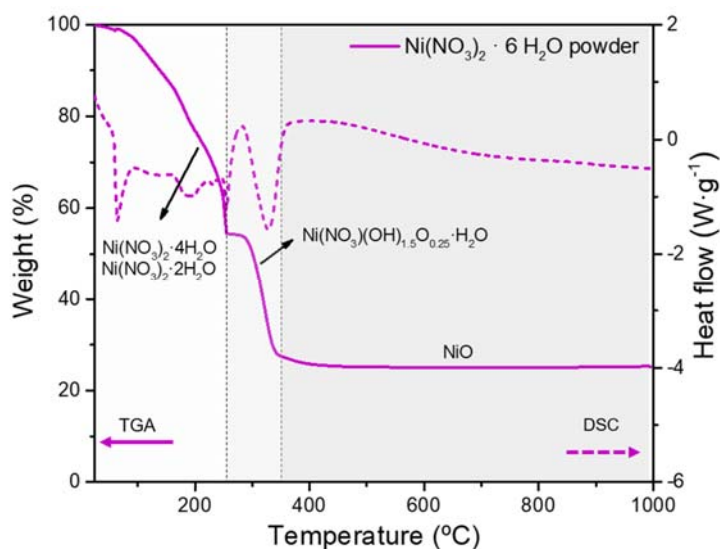

**Figure S1.** Representative TGA/DSC analysis of nickel nitrate hexahydrate powder. Weight change (left axis-solid line) and heat flow (right axis-dotted line) vs. temperature during heat treatment under a nitrogen flow rate of  $100 \text{ ml} \cdot \text{min}^{-1}$  (heating rate of  $10 \text{ }^\circ\text{C} \cdot \text{min}^{-1}$ ). Different stages during thermal decomposition are highlighted by shaded grey areas. The thermal decomposition of nickel nitrate hexahydrate powder proceeds stepwise according to <sup>1</sup>: Water separation at  $50 - 80 \text{ }^\circ\text{C}$  [ $\text{Ni}(\text{NO}_3)_2 \cdot 6\text{H}_2\text{O} = \text{Ni}(\text{NO}_3)_2 \cdot 4\text{H}_2\text{O} + 2\text{H}_2\text{O}$ ;  $\text{Ni}(\text{NO}_3)_2 \cdot 4\text{H}_2\text{O} = \text{Ni}(\text{NO}_3)_2 \cdot 2\text{H}_2\text{O} + 2\text{H}_2\text{O}$ ]; partial decomposition steps at  $\approx 150 - 250 \text{ }^\circ\text{C}$  [oxidation and partial condensation;  $\text{Ni}(\text{NO}_3)_2 \cdot 2\text{H}_2\text{O} = \text{Ni}(\text{NO}_3)(\text{OH})_2 \cdot \text{H}_2\text{O} + \text{NO}_2$ ;  $\text{Ni}(\text{NO}_3)(\text{OH})_2 \cdot \text{H}_2\text{O} = \text{Ni}(\text{NO}_3)(\text{OH})_{1.5} \text{O}_{0.25} \cdot \text{H}_2\text{O} + 0.25\text{H}_2\text{O}$ ]; and final oxide decomposition at  $\approx 300 \text{ }^\circ\text{C}$  [ $\text{Ni}(\text{NO}_3)(\text{OH})_{1.5} \text{O}_{0.25} \cdot \text{H}_2\text{O} = 0.5\text{Ni}_2\text{O}_3 + \text{HNO}_3 + 1.25\text{H}_2\text{O}$ ;  $3\text{Ni}_2\text{O}_3 = 2\text{Ni}_3\text{O}_4 + 0.5\text{O}_2$ ;  $\text{Ni}_3\text{O}_4 = 3\text{NiO} + 0.5\text{O}_2$ ].

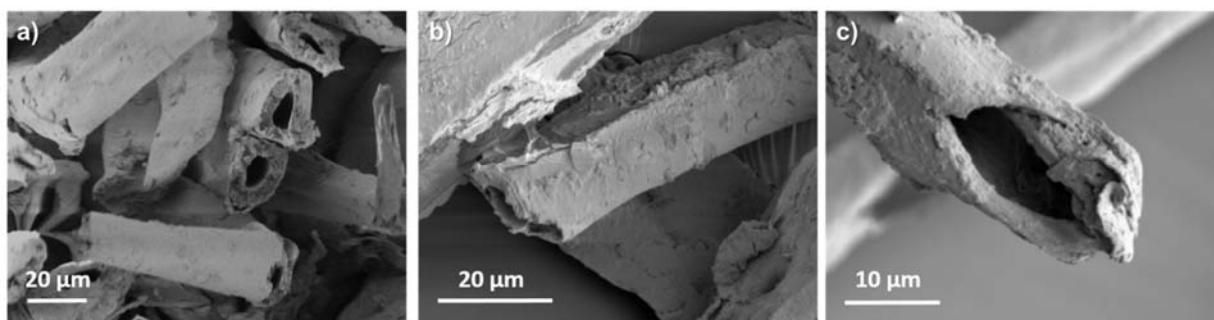

**Figure S2.** Representative SEM micrographs of: a) conventional non-treated MDF showing the compacted and pressed fibrous structure and b, c) MDF impregnated with an aqueous nickel nitrate solution before pyrolysis showing the debonding of cellulosic fibres but no change in fibre morphology.

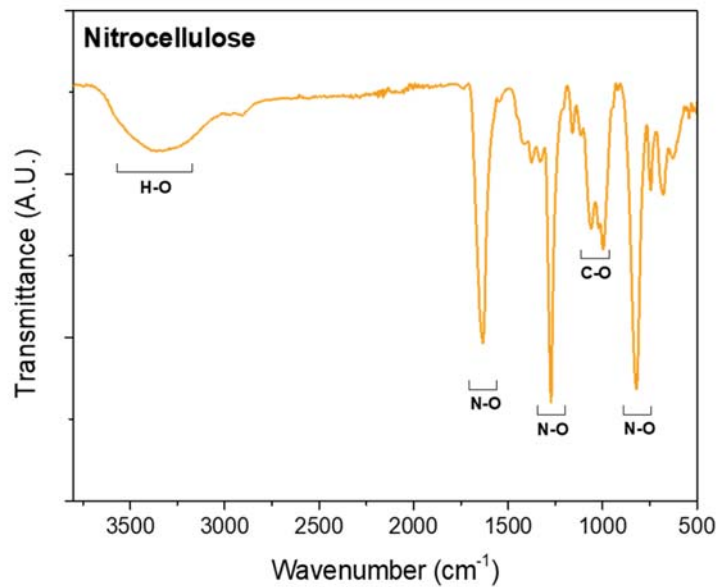

**Figure S3.** FTIR spectra of nitrocellulose synthesized by esterification of hydroxyl groups with nitric acid and sulphuric acid (weight ratio 1:3) of natural cotton.

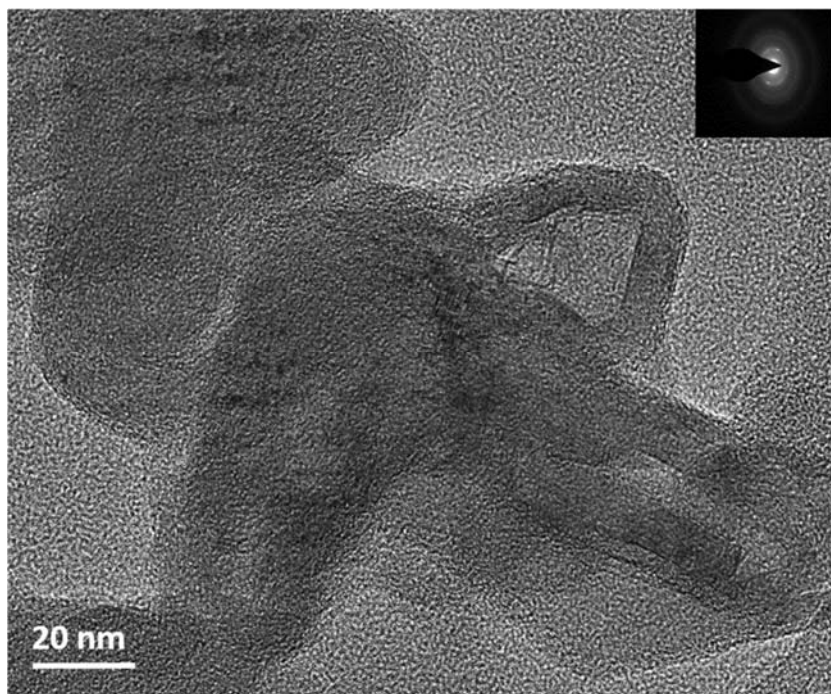

**Figure S4.** High-resolution TEM image and selected-area electron diffraction pattern (SAED) inset of a MDF sample impregnated with an aqueous nickel nitrate solution after pyrolysis up to 300 °C.

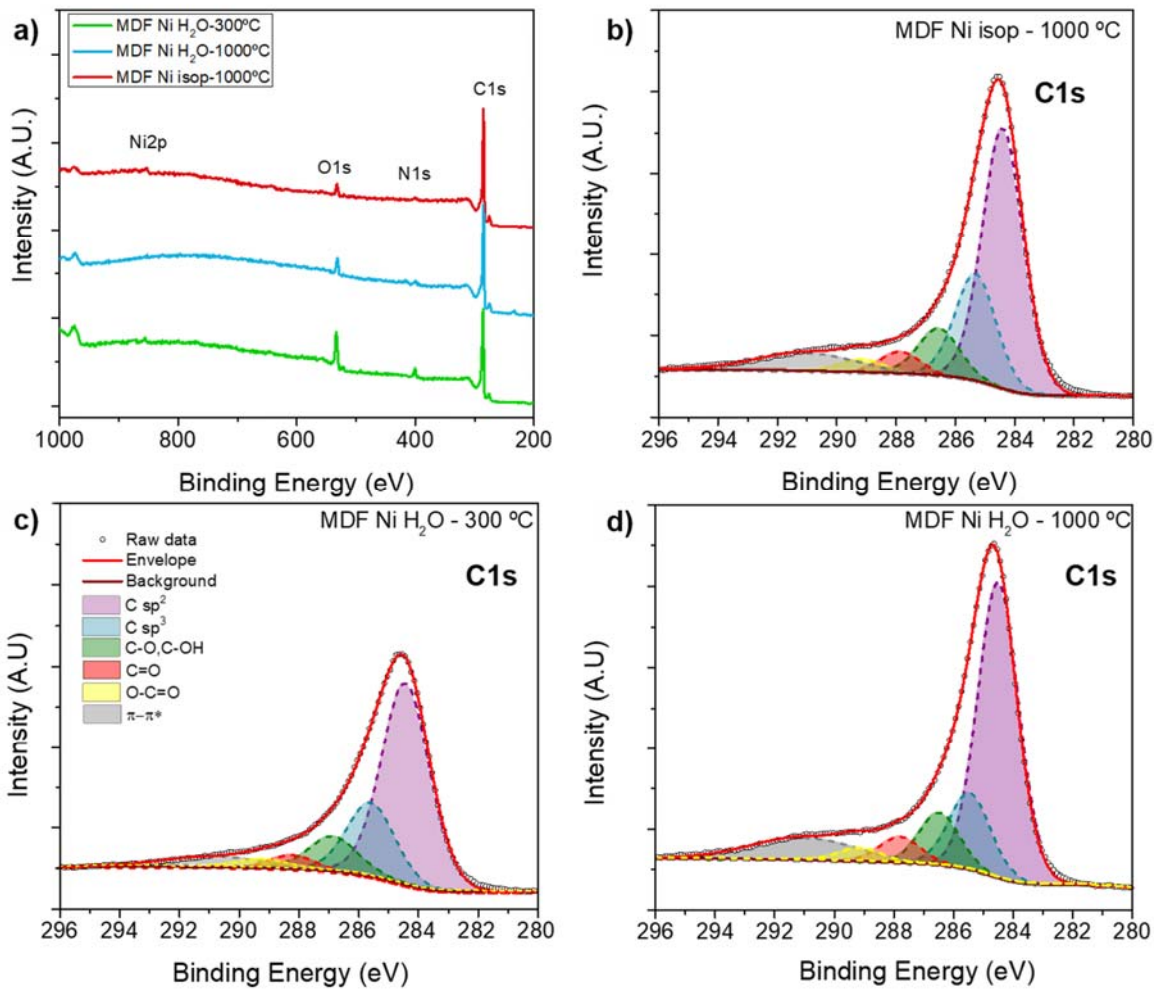

**Figure S5.** XPS spectra exhibiting characteristic peaks located at  $\approx 285$ , 400, 533 and 855 eV, corresponding to C 1s, N 1s, O 1s and Ni 2p contributions, respectively. a) General XPS spectra and b, c, d) Results of C 1s spectra fitting of MDF Ni H<sub>2</sub>O 300 and 1000 °C compared to that of MDF Ni isop 1000 °C.

**Table S1.** Comparison of specific capacitances of biomass-derived carbon materials as electrode for supercapacitor applications from this work and other previously reported carbon materials in aqueous electrolytes.

| Biomass source                               | $S_{\text{BET}}$ ( $\text{m}^2 \cdot \text{g}^{-1}$ ) | Activation agent                     | Measurements conditions                                                                                                                                    | Specific capacitance ( $\text{F} \cdot \text{g}^{-1}$ )                                                 | Rate capability, capacitance retention                  | Cycling stability, capacitance retention |
|----------------------------------------------|-------------------------------------------------------|--------------------------------------|------------------------------------------------------------------------------------------------------------------------------------------------------------|---------------------------------------------------------------------------------------------------------|---------------------------------------------------------|------------------------------------------|
| <b>Medium density fiberboard [This work]</b> | 333                                                   | $\text{Ni}(\text{NO}_3)_2$           | Set-up: symmetric two-electrode<br>Electrolyte: 6 M KOH<br>Electrode mass: 5 mg<br>Voltage range: 0 – 1 V                                                  | $\approx 72 \text{ F} \cdot \text{g}^{-1}$ at $20 \text{ mA} \cdot \text{g}^{-1}$<br>(GCD experiment)   | $\approx 75 \%$ at $100 \text{ A} \cdot \text{g}^{-1}$  | $\approx 96 \%$ (10 000 cycles)          |
| <b>Coconut leaves <sup>2</sup></b>           | 493                                                   | $\text{CO}_2$                        | Set-up: symmetric two-electrode<br>Electrolyte: 6 M KOH<br>Electrode mass: ---<br>Voltage range: 0 – 1 V                                                   | $\approx 133 \text{ F} \cdot \text{g}^{-1}$ at $200 \text{ mA} \cdot \text{g}^{-1}$<br>(GCD experiment) | $\approx 84 \%$ at $5 \text{ A} \cdot \text{g}^{-1}$    | $\approx 74 \%$ (10 000 cycles)          |
| <b>Chitin nanofibers <sup>3</sup></b>        | 256                                                   | HCl + freeze drying                  | Set-up: symmetric two-electrode<br>Electrolyte: 6 M KOH<br>Electrode mass: 0.61 mg<br>Voltage range: 0 – 1 V                                               | $\approx 124 \text{ F} \cdot \text{g}^{-1}$ at $25 \text{ mA} \cdot \text{g}^{-1}$<br>(GCD experiment)  | $\approx 47 \%$ at $50 \text{ A} \cdot \text{g}^{-1}$   | -----                                    |
| <b>Cornstalks <sup>4</sup></b>               | 326                                                   | $\text{K}_4[\text{Fe}(\text{CN})_6]$ | Set-up: three-electrode<br>Electrolyte: 6 M KOH<br>Electrode mass: 5 mg<br>Potential range: $-1.1-0.1 \text{ V}$ (vs. $\text{Hg}/\text{Hg}_2\text{Cl}_2$ ) | $\approx 96 \text{ F} \cdot \text{g}^{-1}$ at $1 \text{ A} \cdot \text{g}^{-1}$<br>(GCD experiment)     | $\approx 70.5 \%$ at $20 \text{ A} \cdot \text{g}^{-1}$ | -----                                    |
| <b>Crab shells <sup>5</sup></b>              | 269                                                   | $\text{FeCl}_3$                      | Set-up: symmetric two-electrode<br>Electrolyte: 6 M KOH<br>Electrode mass: 2-3 mg<br>Voltage range: 0 – 1 V                                                | $\approx 128.6 \text{ F} \cdot \text{g}^{-1}$ at $1 \text{ A} \cdot \text{g}^{-1}$<br>(GCD experiment)  | $\approx 70 \%$ at $10 \text{ A} \cdot \text{g}^{-1}$   | -----                                    |

| Biomass source                     | $S_{\text{BET}}$ ( $\text{m}^2 \cdot \text{g}^{-1}$ ) | Activation agent                                                                  | Measurements conditions                                                           | Specific capacitance ( $\text{F} \cdot \text{g}^{-1}$ )                                                | Rate capability, capacitance retention                | Cycling stability, capacitance retention |
|------------------------------------|-------------------------------------------------------|-----------------------------------------------------------------------------------|-----------------------------------------------------------------------------------|--------------------------------------------------------------------------------------------------------|-------------------------------------------------------|------------------------------------------|
| Glucose <sup>6</sup>               | 992                                                   | KOH +<br>$\text{Fe}(\text{NO}_3)_3 \cdot 9\text{H}_2\text{O}$                     | Set-up: symmetric two-electrode                                                   | $\approx 207 \text{ F} \cdot \text{g}^{-1}$ at $1 \text{ A} \cdot \text{g}^{-1}$<br>(GCD experiment)   | $\approx 78\%$ at $50 \text{ A} \cdot \text{g}^{-1}$  | $\approx 83.7\%$ (5000 cycles)           |
|                                    |                                                       |                                                                                   | Electrolyte: 6 M KOH<br>Electrode mass: 1-2 mg<br>Voltage range: 0 – 1 V          |                                                                                                        |                                                       |                                          |
| Rotten potatoes <sup>7</sup>       | 960                                                   | KOH                                                                               | Set-up: symmetric two-electrode                                                   | $\approx 192 \text{ F} \cdot \text{g}^{-1}$ at $1 \text{ A} \cdot \text{g}^{-1}$<br>(GCD experiment)   | $\approx 53\%$ at $100 \text{ A} \cdot \text{g}^{-1}$ | -----                                    |
|                                    |                                                       |                                                                                   | Electrolyte: 6 M KOH<br>Electrode mass: 2 mg<br>Voltage: 0 – 0.8 V                |                                                                                                        |                                                       |                                          |
| Sheet cellulose <sup>8</sup>       | 539                                                   | Ball milling +<br>KOH + freeze<br>drying                                          | Set-up: three-electrode                                                           | $\approx 206 \text{ F} \cdot \text{g}^{-1}$ at $1 \text{ A} \cdot \text{g}^{-1}$<br>(GCD experiment)   | $\approx 39\%$ at $20 \text{ A} \cdot \text{g}^{-1}$  | -----                                    |
|                                    |                                                       |                                                                                   | Electrolyte: 6 M KOH<br>Electrode mass: 2 mg<br>Potential: -1.0 – 0 V (vs.Hg/HgO) |                                                                                                        |                                                       |                                          |
| Soybeans <sup>9</sup>              | 580                                                   | KOH                                                                               | Set-up: symmetric two-electrode                                                   | $\approx 100 \text{ F} \cdot \text{g}^{-1}$ at $50 \text{ mA} \cdot \text{g}^{-1}$<br>(GCD experiment) | $\approx 57\%$ at $20 \text{ A} \cdot \text{g}^{-1}$  | -----                                    |
|                                    |                                                       |                                                                                   | Electrolyte: 6 M KOH<br>Electrode mass: 3 mg<br>Voltage: 0 – 1 V                  |                                                                                                        |                                                       |                                          |
| Sucrose <sup>10</sup>              | 691                                                   | Hydrothermal +<br>$\text{Ni}(\text{CH}_3\text{CO}_2)_2 \cdot 4\text{H}_2\text{O}$ | Set-up: symmetric two-electrode                                                   | $\approx 248 \text{ F} \cdot \text{g}^{-1}$ at $50 \text{ mA} \cdot \text{g}^{-1}$<br>(GCD experiment) | $\approx 85\%$ at $5 \text{ A} \cdot \text{g}^{-1}$   | $\approx 94\%$ (5000 cycles)             |
|                                    |                                                       |                                                                                   | Electrolyte: 6 M KOH<br>Electrode mass: ---<br>Voltage: 0 – 1 V                   |                                                                                                        |                                                       |                                          |
| Sunflower seed shell <sup>11</sup> | 619                                                   | KOH                                                                               | Set-up: symmetric two-electrode                                                   | $\approx 213 \text{ F} \cdot \text{g}^{-1}$ at $25 \text{ mA} \cdot \text{g}^{-1}$<br>(GCD experiment) | $\approx 35\%$ at $10 \text{ A} \cdot \text{g}^{-1}$  | -----                                    |
|                                    |                                                       |                                                                                   | Electrolyte: 30 wt. % KOH<br>Electrode mass: 20 mg<br>Voltage: 0 – 1 V            |                                                                                                        |                                                       |                                          |

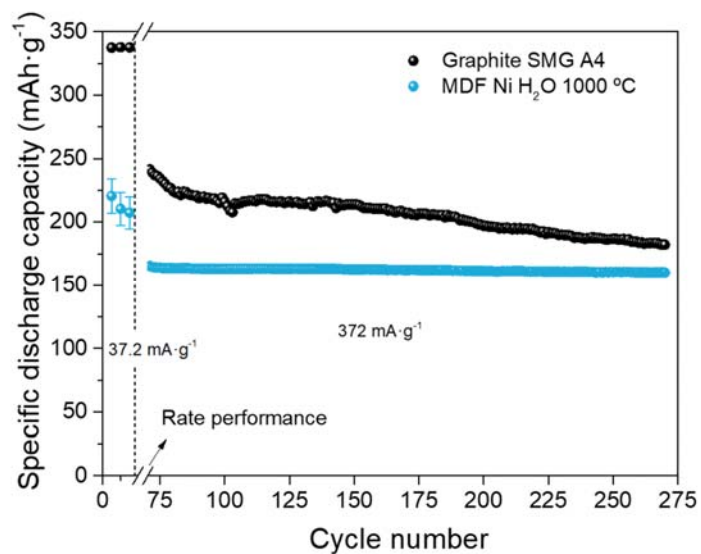

**Figure S6.** Cycling performance of a commercial SMG A4 graphite and MDF Ni H<sub>2</sub>O 1000 °C at specific current of 372 mA·g<sup>-1</sup> for 200 cycles after the rate performance experiments.

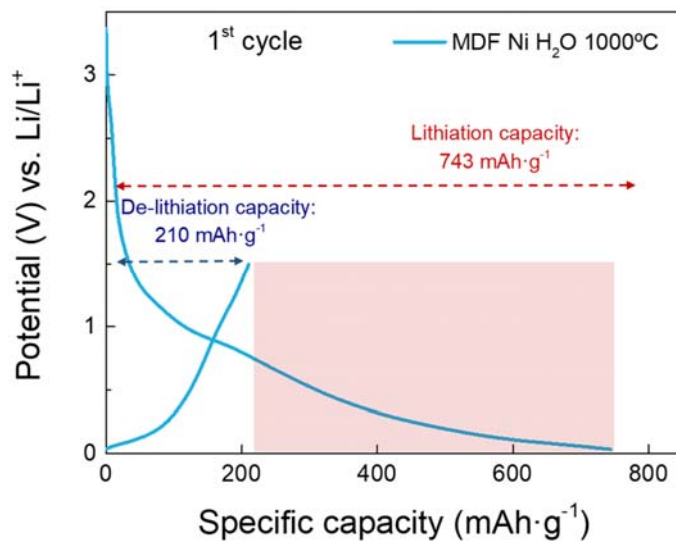

**Figure S7.** Representative constant-current potential profile (at a specific current of 37.2 mA·g<sup>-1</sup>) for the 1<sup>st</sup> charge/discharge cycle. Red area shows the irreversible capacity between the first cycle charge/discharge capacities.

## References:

1. Brockner, W.; Ehrhardt, C.; Gjikaj, M., Thermal decomposition of nickel nitrate hexahydrate,  $\text{Ni}(\text{NO}_3)_2 \cdot 6\text{H}_2\text{O}$ , in comparison to  $\text{Co}(\text{NO}_3)_2 \cdot 6\text{H}_2\text{O}$  and  $\text{Ca}(\text{NO}_3)_2 \cdot 4\text{H}_2\text{O}$ . *Thermochimica Acta* **2007**, *456* (1), 64-68.
2. Sulaiman, K. S.; Mat, A.; Arof, A. K., Activated carbon from coconut leaves for electrical double-layer capacitor. *Ionics* **2016**, *22* (6), 911-918.
3. Niu, Q.; Zhao, S.; Gao, K.; Wang, L., Natural nanofibers stacked porous nitrogen-doped carbon nanosheets with promising capacitive performance. *Cellulose* **2019**, *26* (9), 5395-5407.
4. Wang, L.; Mu, G.; Tian, C.; Sun, L.; Zhou, W.; Yu, P.; Yin, J.; Fu, H., Porous Graphitic Carbon Nanosheets Derived from Cornstalk Biomass for Advanced Supercapacitors. *ChemSusChem* **2013**, *6* (5), 880-889.
5. Shi, W.; Chang, B.; Yin, H.; Zhang, S.; Yang, B.; Dong, X., Crab shell-derived honeycomb-like graphitized hierarchically porous carbons for satisfactory rate performance of all-solid-state supercapacitors. *Sustainable Energy & Fuels* **2019**, *3* (5), 1201-1214.
6. Qin, J.; Zhu, S.; Feng, C.; Zhao, N.; Shi, C.; Liu, E.-Z.; He, F.; Ma, L.; Li, J.; He, C., In-situ space-confined catalysis for fabricating 3D mesoporous graphene and their capacitive properties. *Applied Surface Science* **2018**, *433*, 568-574.
7. Chen, X.; Wu, K.; Gao, B.; Xiao, Q.; Kong, J.; Xiong, Q.; Peng, X.; Zhang, X.; Fu, J., Three-Dimensional Activated Carbon Recycled from Rotten Potatoes for High-performance Supercapacitors. *Waste and Biomass Valorization* **2016**, *7* (3), 551-557.
8. Mo, R.-J.; Zhao, Y.; Zhao, M.-M.; Wu, M.; Wang, C.; Li, J.-P.; Kuga, S.; Huang, Y., Graphene-like porous carbon from sheet cellulose as electrodes for supercapacitors. *Chemical Engineering Journal* **2018**, *346*, 104-112.
9. Long, C.; Jiang, L.; Wu, X.; Jiang, Y.; Yang, D.; Wang, C.; Wei, T.; Fan, Z., Facile synthesis of functionalized porous carbon with three-dimensional interconnected pore structure for high volumetric performance supercapacitors. *Carbon* **2015**, *93*, 412-420.
10. Liu, T.; Liu, E.; Ding, R.; Luo, Z.; Hu, T.; Li, Z., Preparation and supercapacitive performance of clew-like porous nanocarbons derived from sucrose by catalytic graphitization. *Electrochimica Acta* **2015**, *173*, 50-58.
11. Li, X.; Xing, W.; Zhuo, S.; Zhou, J.; Li, F.; Qiao, S.-Z.; Lu, G.-Q., Preparation of capacitor's electrode from sunflower seed shell. *Bioresource Technology* **2011**, *102* (2), 1118-1123.
